# Supplementary material for: Louse flies of Eleonora’s falcons that also feed on their prey are evolutionary dead‐end hosts for blood parasites
Source: PubMed Central journal article supplement (PMC6850589; doi:10.1111/mec.15020), 2019-04-04
Supplement: MEC-28-1812-s002.pdf [file MEC-28-1812-s002.pdf]

## Electronic Supplementary Material

### Louse flies of Eleonora’s falcons that also feed on their prey are evolutionary dead-end hosts for blood parasites

Laura Gangoso, Rafael Gutiérrez-López, Josué Martínez-de la Puente & Jordi Figuerola

**Table S2.** *Haemoproteus* and *Plasmodium* parasite lineages found in this study. The different avian host where these lineages were isolated according to MalAvi public database (Bensch et al. 2009) are shown. The different continents are abbreviated as: “Af” = Africa, “Am” = America, “As” = Asia, “Eu” = Europe, and “Oce” = Oceania. The host species recorded as prey of Eleonora’s falcons (*Falco eleonora*) on the Canary Islands are highlighted with an \*.

| Parasites                             | Bird hosts    |                |                        |                      |                  |               | <i>F. eleonora</i> |
|---------------------------------------|---------------|----------------|------------------------|----------------------|------------------|---------------|--------------------|
| <i>Parasite lineage</i>               | Order         | Family         | Genus                  | Species              | Continent        | References    | Prey               |
| <i>Haemoproteus sp.</i> ACDUM2        | Passeriformes | Sylviidae      | Acrocephalus           | <i>A. agricola</i>   | As, Eu           | 1, 2, 3       |                    |
|                                       |               |                |                        | <i>A. dumetorum</i>  | As               | 4             |                    |
|                                       |               |                | Hippolais              | <i>H. polyglotta</i> | Eu               | 5, This study | *                  |
|                                       |               |                | Sylvia                 | <i>S. communis</i>   | Eu               | This study    | *                  |
| <i>Haemoproteus sp.</i> HIPOL4        | Passeriformes | Sylviidae      | Hippolais              | <i>H. polyglotta</i> | Eu               | This study    | *                  |
| <i>Haemoproteus sp.</i> LANSEN1       | Passeriformes | Laniidae       | Lanius                 | <i>L. senator</i>    | Eu               | This study    | *                  |
|                                       |               | Muscicapidae   | Ficedula               | <i>F. hypoleuca</i>  | Eu               | This study    | *                  |
| <i>Haemoproteus sp.</i> HIPOL5        | Passeriformes | Phylloscopidae | Phylloscopus           | <i>P. bonelli</i>    | Eu               | This study    | *                  |
|                                       |               | Sylviidae      | Hippolais              | <i>H. polyglotta</i> | Eu               | This study    | *                  |
| <i>Haemoproteus attenuatus</i> ROBIN1 | Passeriformes | Laniidae       | Lanius                 | <i>L. senator</i>    | Eu               | This study    | *                  |
|                                       |               | Turdidae       | Erithacus              | <i>E. rubecula</i>   | Af, As, Eu       | 2, 4, 6, 7    | *                  |
|                                       |               |                | Luscinia               | <i>L. luscinia</i>   | As, Eu           | 4, 8, 9, 10   |                    |
|                                       |               |                | <i>L. megarhynchos</i> | Eu                   | 2, 4, This study | *             |                    |

|                                        |               |                       |                      |                          |            |                                       |   |
|----------------------------------------|---------------|-----------------------|----------------------|--------------------------|------------|---------------------------------------|---|
|                                        |               |                       | Luscinia             | <i>L. luscinia</i>       | As, Eu     | 4, 8, 9, 10                           |   |
|                                        |               |                       |                      | <i>L. megarhynchos</i>   | Eu         | 2, 4, This study                      | * |
|                                        |               |                       | Saxicola             | <i>S. rubetra</i>        | Af, Eu     | 4                                     | * |
| <i>Haemoproteus balmorali</i><br>COLL3 | Passeriformes | Muscicapidae          | Ficedula             | <i>F. albicollis</i>     | Eu         | 11                                    |   |
|                                        |               |                       |                      | <i>F. hypoleuca</i>      | As         | 12, This study                        |   |
|                                        |               |                       |                      | <i>F. speculigera</i>    | Af         | 6                                     |   |
|                                        |               |                       | Muscicapa            | <i>M. striata</i>        | As         | 13                                    |   |
| <i>Haemoproteus balmorali</i><br>SFC1  | Passeriformes | Muscicapidae          | Muscicapa            | <i>M. striata</i>        | Af, As, Eu | 2, 6, 13, 14, 15                      | * |
|                                        |               | Paridae               | Cyanistes            | <i>C. caeruleus</i>      | Eu         | 16, 17, 18, 19                        |   |
| <i>Haemoproteus sp.</i> ERU-15H        | Passeriformes | Laniidae              | Lanius               | <i>L. collurio</i>       | Eu-As      | Yindrim et al. unpubl                 |   |
| <i>Haemoproteus sp.</i> HIPOL1         | Passeriformes | Muscicapidae          | Ficedula             | <i>F. hypoleuca</i>      | Eu         | This study                            | * |
|                                        |               | Sylviidae             | Hippolais            | <i>H. icterina</i>       | Eu         | 5                                     |   |
|                                        |               |                       |                      | <i>H. polyglotta</i>     | Eu, Af     | 5, 6, This study                      | * |
|                                        |               | Sylvia                | <i>S. communis</i>   | Eu                       | This study | *                                     |   |
| Ploceidae                              | Ploceus       | <i>P. nigricollis</i> | Af                   | 4                        |            |                                       |   |
| <i>Haemoproteus pallidus</i> PFC1      | Passeriformes | Fringillidae          | Coccothraustes       | <i>C. coccothraustes</i> | As         | 4                                     |   |
|                                        |               | Muscicapidae          | Ficedula             | <i>F. albicollis</i>     | Eu         | 11, 10, 21, 22                        |   |
|                                        |               |                       |                      | <i>F. hypoleuca</i>      | Af, As, Eu | 4, 12, 13, 14, 20, 24, 25, This study | * |
|                                        |               | Phylloscopidae        | Phylloscopus         | <i>P. trochilus</i>      | Eu         | This study                            | * |
|                                        |               | Sylviidae             | Acrocephalus         | <i>A. paludicola</i>     | Eu         | This study                            | * |
|                                        |               |                       |                      | <i>S. cantillans</i>     | Eu         | This study                            | * |
|                                        |               |                       |                      | <i>S. communis</i>       | Eu         | This study                            | * |
| <i>Haemoproteus palloris</i> WW1       | Anseriformes  | Anatidae              | Cygnus               | <i>C. olor</i>           | Eu         | 26                                    |   |
|                                        | Passeriformes | Muscicapidae          | Ficedula             | <i>F. hypoleuca</i>      | As         | 12                                    |   |
|                                        |               | Estrildidae           | Uraeginthus          | <i>U. bengalus</i>       | Af         | 4                                     |   |
|                                        |               | Panuridae             | Panurus              | <i>P. biarmicus</i>      | As         | Yildrim et al. unpubl                 |   |
|                                        |               |                       | Cyanistes            | <i>C. caeruleus</i>      | Eu         | 16, 17                                |   |
|                                        |               | Paridae               | Poecile              | <i>P. montanus</i>       | As         | 24                                    |   |
|                                        |               | Ploceidae             | Euplectes            | <i>E. macroura</i>       | Af         | 4                                     |   |
|                                        |               | Phylloscopidae        | Phylloscopus         | <i>P. trochilus</i>      | Af, As, Eu | 4, 27, 28, 29, 30                     | * |
|                                        | Sylviidae     | Acrocephalus          | <i>A. scirpaceus</i> | As                       | 12         |                                       |   |
|                                        |               | Sylvia                | <i>S. borin</i>      | Eu                       | 31         | *                                     |   |
| Upupiformes                            | Upupidae      | Upupa                 | <i>U. epops</i>      | As                       | 32         |                                       |   |
| <i>Haemoproteus payevsyi</i> RW1       | Passeriformes | Laniidae              | Lanius               | <i>L. meridionalis</i>   | Eu         | 33                                    |   |
|                                        |               | Cinclidae             | Cinclus              | <i>C. cinclus</i>        | Eu         | 34                                    |   |

|                                 |                |                      |                  |                         |        |                            |   |
|---------------------------------|----------------|----------------------|------------------|-------------------------|--------|----------------------------|---|
|                                 |                | Cisticolidae         | Cisticola        | <i>C. nigriloris</i>    | Af     | 29                         |   |
|                                 |                | Sylviidae            | Acrocephalus     | <i>A. baeticatus</i>    | Af     | 29                         |   |
|                                 |                |                      |                  | <i>A. scirpaceus</i>    | As, Eu | 12, 13, 14, 23, 28, 35, 36 | * |
|                                 |                |                      |                  | <i>A. schoenobaenus</i> | Eu     | 36                         |   |
|                                 |                |                      |                  | <i>A. palustris</i>     | As     | 4                          |   |
|                                 |                | Tudidae              | Luscinia         | <i>L. svecica</i>       | Eu     | 37                         | * |
| <i>Haemoproteus sp.</i> RBS3    | Passeriformes  | Laniidae             | Lanius           | <i>L. collurio</i>      | Eu     | 4                          |   |
|                                 |                |                      |                  | <i>L. minor</i>         |        | 2                          |   |
|                                 |                |                      |                  | <i>L. senator</i>       | Eu     | This study                 | * |
| <i>Haemoproteus sp.</i> ORGES1  |                |                      |                  |                         |        | This study                 |   |
| <i>Haemoproteus sp.</i> ORGES2  |                |                      |                  |                         |        | This study                 |   |
| <i>Haemoproteus sp.</i> ORGES3  |                |                      |                  |                         |        | This study                 |   |
| <i>Haemoproteus sp.</i> ORGES4  |                |                      |                  |                         |        | This study                 |   |
| <i>Haemoproteus sp.</i> ORGES5  |                |                      |                  |                         |        | This study                 |   |
| <i>Haemoproteus sp.</i> PHYBON1 | Passeriformes  | Phylloscopidae       | Phylloscopus     | <i>P. bonelli</i>       | Eu     | This study                 | * |
| <i>Haemoproteus sp.</i> PHYTRO1 | Passeriformes  | Phylloscopidae       | Phylloscopus     | <i>P. trochilus</i>     | Eu     | This study                 | * |
| <i>Haemoproteus sp.</i> SYCAN02 | Passeriformes  | Sylviidae            | Sylvia           | <i>S. cantillans</i>    | Eu     | This study                 | * |
| <i>Plasmodium</i> AFTRU5        | Passeriformes  | Turdidae             | Luscinia         | <i>L. svecica</i>       | As     | 38                         |   |
|                                 |                |                      | Turdus           | <i>T. merula</i>        | Eu, Af | 6, 39                      |   |
|                                 |                |                      | <i>T. pelios</i> | Af                      | 4, 40  |                            |   |
|                                 |                | Muscicapidae         | Erithacus        | <i>E. rubecula</i>      | Eu     | 41                         | * |
|                                 | Psittaciformes | Psittacidae          | Melopsittacus    | <i>M. undulatus</i>     | Oce    | 42                         |   |
| <i>Plasmodium sp.</i> LK6       | Falconiformes  | Falconidae           | Falco            | <i>F. eleonora</i>      | Eu     | 43, 44                     |   |
|                                 |                |                      |                  | <i>F. naumanni</i>      | Eu     | 45, 46                     |   |
|                                 |                |                      |                  |                         |        |                            |   |
|                                 | Passeriformes  | Alaudidae            | Galerida         | <i>G. cristata</i>      | Af     | 6                          |   |
|                                 |                | Fringillidae         | Emberiza         | <i>E. cirrus</i>        | Af     | 6                          |   |
|                                 |                |                      | Serinus          | <i>S. canarius</i>      | Eu     | 41                         |   |
|                                 |                | Motacillidae         | Anthus           | <i>A. berthelotti</i>   | Eu     | 41.47, 48                  |   |
|                                 |                | <i>A. campestris</i> | Eu               | 49                      | *      |                            |   |
| Muscicapidae                    | Phoenicurus    | <i>P. moussieri</i>  | Af               | 6                       |        |                            |   |
| Paridae                         | Periparus      | <i>P. ater</i>       | Af               | 6                       |        |                            |   |
|                                 | Cyanistes      | <i>C. teneriffae</i> | Af               | 6, 41                   |        |                            |   |

|                                     |                      |                |                    |                          |                      |                                       |              |  |
|-------------------------------------|----------------------|----------------|--------------------|--------------------------|----------------------|---------------------------------------|--------------|--|
|                                     |                      | Phylloscopidae | Phylloscopus       | <i>P. canariensis</i>    | Eu                   | 41                                    |              |  |
|                                     |                      | Sylviidae      | Sylvia             | <i>S. conspicillata</i>  | Af, Eu               | 50                                    |              |  |
|                                     |                      |                |                    | <i>S. melanocephala</i>  | Af, Eu               | 6, 41                                 |              |  |
| <i>Plasmodium sp.</i> MOALB1        | Passeriformes        | Alaudidae      | Alauda             | <i>A. arvensis</i>       | Eu                   | 51                                    |              |  |
|                                     |                      | Motacillidae   | Motacilla          | <i>M. alba</i>           |                      | 4                                     | *            |  |
|                                     |                      |                |                    | <i>M. flava</i>          | Eu                   | This study                            | *            |  |
| <i>Plasmodium relictum</i><br>GRW11 | Charadriiformes      | Scolopacidae   | Philomachus        | <i>P. pugnax</i>         | Eu                   | 52                                    |              |  |
|                                     | Gruiformes           | PhAsnidae      | Lophophorus        | <i>L. impejanus</i>      | As                   | 53                                    |              |  |
|                                     |                      |                | Chrysolophus       | <i>C. amherstiae</i>     | As                   | 53                                    |              |  |
|                                     | Passeriformes        | Alaudidae      | Alauda             | <i>A. arvensis</i>       | Eu                   | 51                                    |              |  |
|                                     |                      | Certhiidae     | Troglodytes        | <i>T. troglodytes</i>    | Eu                   | 6, 54                                 |              |  |
|                                     |                      |                |                    |                          | <i>C. corone</i>     | As, Eu                                | 55, 56       |  |
|                                     |                      | Corvidae       | Corvus             | <i>C. macrorhynchos</i>  | As                   | 57                                    |              |  |
|                                     |                      |                |                    | Garrulus                 | <i>G. glandarius</i> | As                                    | 54           |  |
|                                     |                      | Fringiliidae   | Carduelis          | <i>C. carduelis</i>      | As                   | 54                                    |              |  |
|                                     |                      |                |                    | Emberiza                 | <i>E. cirius</i>     | Eu                                    | 6, 54        |  |
|                                     |                      |                |                    | Fringilla                | <i>F. coelebs</i>    | As, Af, Eu                            | 2, 6, 12, 54 |  |
|                                     |                      |                |                    | Pyrrhula                 | <i>P. pyrrhula</i>   | As                                    | 54           |  |
|                                     |                      | Muscicapidae   | Ficedula           | <i>F. albicollis</i>     | Eu                   | 11, 21, 25                            |              |  |
|                                     |                      |                | Phoenicurus        | <i>P. ochruros</i>       | Eu                   | 6, 54                                 | *            |  |
|                                     |                      | Hirundinidae   | Delichon           | <i>D. urbicum</i>        | Af, Eu               | 58, 59, 60                            |              |  |
|                                     |                      |                |                    | <i>D. dasypus</i>        | As                   | 61                                    |              |  |
|                                     |                      | Laniidae       | Lanius             | <i>L. collurio</i>       | Eu                   | 2                                     |              |  |
|                                     |                      | Passeridae     | Passer             | <i>P. domesticus</i>     | Af, Eu               | 2, 6, 28, 39, 54, 62, 63, 64, 65, 108 |              |  |
|                                     |                      |                |                    | <i>P. hispaniolensis</i> | Af, Eu               | 2, 6, 54, 66                          |              |  |
|                                     |                      |                |                    | <i>P. montanus</i>       | As, Eu               | 2, 66                                 |              |  |
|                                     |                      | Pariidae       | Cyanistes          | <i>C. caeruleus</i>      | Eu                   | 6, 16, 18, 19, 54, 67, 68, 69, 70     |              |  |
|                                     | <i>C. teneriffae</i> |                |                    | Af                       | 6, 54                |                                       |              |  |
|                                     | Parus                |                | <i>P. major</i>    | As, Eu                   | 6, 7, 54, 71, 72     |                                       |              |  |
|                                     |                      | Periparus      | <i>P. ater</i>     | Af                       | 6, 54                |                                       |              |  |
|                                     | Pycnonotidae         | Pycnonotus     | <i>P. capensis</i> | Af                       | 73                   |                                       |              |  |
|                                     | Sylviidae            | Acrocephalus   | <i>A. agricola</i> | Eu                       | 1, 2                 |                                       |              |  |
| <i>A. arundinaceus</i>              |                      |                | Eu                 | 2, 74                    |                      |                                       |              |  |
| <i>A. scirpaceus</i>                |                      |                | Eu                 | 28                       | *                    |                                       |              |  |

|                                               |                    |                  |                        |                                  |                         |            |                    |   |
|-----------------------------------------------|--------------------|------------------|------------------------|----------------------------------|-------------------------|------------|--------------------|---|
|                                               |                    | Sylvia           | Cettia                 | <i>C. cetti</i>                  | Eu                      | 28         |                    |   |
|                                               |                    |                  | Sylvia                 |                                  | <i>S. atricapilla</i>   | Eu         | 4, 75              |   |
|                                               |                    |                  |                        |                                  | <i>S. borin</i>         | As, Af, Eu | 4, 12, 76          | * |
|                                               |                    |                  |                        |                                  | <i>S. cantillans</i>    | Eu         | 2                  | * |
|                                               |                    |                  |                        |                                  | <i>S. communis</i>      | As         | 12, 54, This study | * |
|                                               |                    |                  |                        |                                  | <i>S. conspicillata</i> | Eu         | 50                 |   |
|                                               |                    |                  |                        |                                  | <i>S. curruca</i>       | As         | 12, 54             |   |
|                                               |                    |                  |                        |                                  | <i>S. melanocephala</i> | Eu         | 4                  |   |
|                                               |                    |                  | <i>S. nisoria</i>      | As                               | 54                      |            |                    |   |
|                                               |                    | Turdidae         | Erithacus              | <i>E. rubecula</i>               | Eu                      | 6, 54      | *                  |   |
| Luscinia                                      | <i>L. luscinia</i> |                  | Eu                     | 4                                |                         |            |                    |   |
|                                               | <i>L. svecica</i>  |                  | Eu                     | 37, 77                           | *                       |            |                    |   |
| Saxicola                                      | <i>S. rubetra</i>  | As               | Yildirim et al. unpubl |                                  |                         |            |                    |   |
| <i>Plasmodium relictum</i> SGS1<br>(Rinshi-1) | Anseriformes       | Anatidae         | Anas                   | <i>A. acuta</i>                  | Eu                      | 78         |                    |   |
|                                               |                    |                  | Marmaronetta           | <i>M. angustirostris</i>         | Eu                      | 78         |                    |   |
|                                               | Charadriiformes    | Laridae          | Larus                  |                                  | <i>L. argentatus</i>    | Eu         | 79                 |   |
|                                               |                    |                  |                        |                                  | <i>L. cachinnans</i>    | Eu         | 79                 |   |
|                                               |                    |                  |                        |                                  | <i>L. mongolicus</i>    | As         | 80                 |   |
|                                               |                    | Recurvirostridae | Himantopus             | <i>H. himantopus</i>             | Eu                      | 81         |                    |   |
|                                               |                    | Scolopacidae     | Gallinago              | <i>G. gallinago</i>              | Eu                      | 81         |                    |   |
|                                               | Ciconiiformes      | Ardeidae         | Botaurus               | <i>B. stellaris</i>              | As                      | 82         |                    |   |
|                                               |                    |                  | Bubulcus               | <i>B. ibis</i>                   | Eu                      | 78         |                    |   |
|                                               |                    | Ciconiidae       | Ciconia                | <i>C. ciconia</i>                | Eu                      | 78         |                    |   |
|                                               | Columbiformes      | Columbidae       | Columba                | <i>C. livia</i>                  | Eu                      | 83         |                    |   |
|                                               | Galliformes        | PhAsnidae        | Gallus                 | <i>G. gallus</i>                 | Eu                      | 39         |                    |   |
|                                               |                    |                  | Lophophorus            | <i>L. impejanus</i>              | As                      | 53         |                    |   |
|                                               |                    |                  | Perdix                 | <i>P. perdix</i>                 | Eu                      | 84         |                    |   |
|                                               |                    |                  | Tragopan               | <i>T. temminckii</i>             | As                      | 53         |                    |   |
|                                               | Gruiformes         | Gruidae          | Grus                   | <i>G. nigricollis</i>            | As                      | 85         |                    |   |
|                                               | Passeriformes      | Alaudidae        | Alauda                 | <i>A. arvensis</i>               | Eu                      | 51         |                    |   |
|                                               |                    |                  | Certhiidae             | Certhia                          | <i>C. brachydactyla</i> | Af, Eu     | 6, 54              |   |
|                                               |                    | Troglodytes      |                        | <i>T. aedon</i>                  | S Am                    | 86         |                    |   |
|                                               |                    |                  |                        | <i>T. troglodytes</i>            | Af, As, Eu              | 6, 54      |                    |   |
| Corvidae                                      | Corvus             | <i>C. corone</i> | As, Eu                 | 55, 56, Scaglione et al. unpubl. |                         |            |                    |   |

|  |              |                    |                          |            |               |   |
|--|--------------|--------------------|--------------------------|------------|---------------|---|
|  |              |                    | <i>C. macrorhynchos</i>  | As         | 57            |   |
|  |              | Cyanopica          | <i>C. cooki</i>          | Eu         | 6, 54         |   |
|  |              | Garrulus           | <i>G. glandarius</i>     | As, Eu     | 2, 54, 87     |   |
|  |              | Pica               | <i>P. pica</i>           | Eu         | 56            |   |
|  | Estrildidae  | Estrilda           | <i>E. astrild</i>        | Eu         | 28            |   |
|  | Fringillidae | Carduelis          | <i>C. chloris</i>        | Af, As, Eu | 6, 54, 87, 88 |   |
|  |              |                    | <i>C. carduelis</i>      | As, Eu     | 2, 6, 54      |   |
|  |              |                    | <i>C. spinus</i>         | As         | 89            |   |
|  |              | Carpodacus         | <i>C. erythrinus</i>     | As, Eu     | 12, 54, 90    |   |
|  |              | Coccothraustes     | <i>C. coccothraustes</i> | As         | 91            |   |
|  |              | Conirostrum        | <i>C. cinereum</i>       | S Am       | 86            |   |
|  |              | Emberiza           | <i>E. calandra</i>       | As         | 54            |   |
|  |              |                    | <i>E. cia</i>            | Eu         | 6, 54         |   |
|  |              |                    | <i>E. cirlus</i>         | Eu         | 6, 54         |   |
|  |              |                    | <i>E. citrinella</i>     | Oce        | 85, 92        |   |
|  |              |                    | <i>E. elegans</i>        | As         | 93            |   |
|  |              |                    | <i>E. godlewskii</i>     | As         | 93            |   |
|  |              |                    | <i>E. hortulana</i>      | As         | 55            |   |
|  |              |                    | <i>E. tahapisi</i>       | Af         | 4             |   |
|  |              | Fringilla          | <i>F. coelebs</i>        | Af, As, Eu | 6, 41, 54, 88 |   |
|  |              | Loxia              | <i>L. curvirostra</i>    | As         | 89            |   |
|  |              | Pyrrhula           | <i>P. pyrrhula</i>       | Eu         | 6, 54         |   |
|  | Serinus      | <i>S. canaria</i>  | Eu                       | 94         |               |   |
|  |              | <i>S. serinus</i>  | Af, Eu                   | 6, 54      |               |   |
|  | Zonotrichia  | <i>Z. capensis</i> | S Am                     | 86         |               |   |
|  | Furnariidae  | Phleocryptes       | <i>P. melanops</i>       | S Am       | 86            |   |
|  | Hirundinidae | Delichon           | <i>D. urbicum</i>        | Af, Eu     | 58, 60        |   |
|  | Laniidae     | Lanius             | <i>L. collaris</i>       | Af         | 95            |   |
|  |              |                    | <i>L. senator</i>        | Eu         | This study    | * |
|  | Motacillidae | Motacilla          | <i>M. flava</i>          | Eu         | 4, 96         | * |
|  | Muscicapidae | Cercotrichas       | <i>C. coryphoeus</i>     | Af         | 95            |   |
|  |              |                    | <i>C. galactotes</i>     | Af         | 4, 6, 54      | * |
|  |              |                    | <i>C. podobe</i>         | Af         | 4             |   |
|  |              | Ficedula           | <i>F. albicollis</i>     | Eu         | 20, 21, 97    |   |

|  |                |              |                       |                          |                                                    |                                                     |  |
|--|----------------|--------------|-----------------------|--------------------------|----------------------------------------------------|-----------------------------------------------------|--|
|  |                |              | <i>F. hypoleuca</i>   | As, Eu                   | 12, 20, 24, 98                                     | *                                                   |  |
|  |                | Muscicapa    | <i>M. striata</i>     | Af, As                   | 4, 6, 54                                           | *                                                   |  |
|  |                | Oenanthe     | <i>O. oenanthe</i>    | Af                       | 54                                                 | *                                                   |  |
|  |                | Phoenicurus  | <i>P. moussieri</i>   | Af                       | 6, 54                                              |                                                     |  |
|  |                |              | <i>P. ochruros</i>    | Eu                       | 6, 54                                              | *                                                   |  |
|  |                |              | <i>P. phoenicurus</i> | As, Eu                   | 2, 54                                              | *                                                   |  |
|  | Paridae        | Cyanistes    | <i>C. caeruleus</i>   | As, Eu                   | 6, 16, 17, 18, 19, 54, 67, 68, 69, 70, 72, 99, 100 |                                                     |  |
|  |                |              |                       | <i>C. teneriffae</i>     | Af                                                 | 6, 54                                               |  |
|  |                |              | Lophophanes           | <i>L. cristatus</i>      | Eu                                                 | 6, 54                                               |  |
|  |                |              | Parus                 | <i>P. major</i>          | Af, As, Eu                                         | 6, 7, 12, 54, 57, 71, 72, 87, 93, 98, 101, 102, 103 |  |
|  |                |              |                       | <i>P. venustulus</i>     | As                                                 | 93                                                  |  |
|  |                |              |                       | <i>P. palustris</i>      | As                                                 | 93                                                  |  |
|  |                |              | Periparus             | <i>P. ater</i>           | Af, Eu                                             | 6, 54, 98                                           |  |
|  |                |              | Poecile               | <i>P. montanus</i>       | As                                                 | 93                                                  |  |
|  |                |              |                       | <i>P. varius</i>         | As                                                 | 87                                                  |  |
|  |                | Passeridae   | Passer                | <i>P. domesticus</i>     | Af, As, Eu, Oce                                    | 2, 6, 28, 39, 54, 55, 62, 63, 64, 65, 92, 110       |  |
|  |                |              |                       | <i>P. griseus</i>        | Af                                                 | Bensch and Ottosson unpubl                          |  |
|  |                |              |                       | <i>P. hispaniolensis</i> | Eu                                                 | 85                                                  |  |
|  |                |              |                       | <i>P. luteus</i>         | Af                                                 | 85                                                  |  |
|  |                |              |                       | <i>P. melanurus</i>      | Af                                                 | 95                                                  |  |
|  |                |              |                       | <i>P. montanus</i>       | As, Eu                                             | 2, 39, 57, 85                                       |  |
|  |                |              | <i>P. rufocinctus</i> | Af                       | 85                                                 |                                                     |  |
|  |                | Prunella     | <i>P. modularis</i>   | As                       | 54                                                 |                                                     |  |
|  | Phylloscopidae | Phylloscopus | <i>P. bonelli</i>     | Eu                       | This study                                         | *                                                   |  |
|  | Ploceidae      | Euplectes    | <i>E. orix</i>        | Af                       | 95                                                 |                                                     |  |
|  |                | Ploceus      | <i>P. capensis</i>    | Af                       | 95                                                 |                                                     |  |
|  |                |              |                       | <i>P. melanocephalus</i> | Eu                                                 | 104                                                 |  |
|  |                |              |                       | <i>P. velatus</i>        | Af                                                 | 95                                                  |  |
|  | Pycnonotidae   | Microscelis  | <i>M. amaurotis</i>   | As                       | 105                                                |                                                     |  |
|  |                |              | Pycnonotus            | <i>P. capensis</i>       | Af                                                 | 73                                                  |  |
|  |                |              | Hypsipetes            | <i>H. amaurotis</i>      | As                                                 | 53                                                  |  |
|  | Sittidae       | Sitta        | <i>S. europaea</i>    | As                       | 93                                                 |                                                     |  |

|                             |               |                      |                        |                         |                    |                       |     |
|-----------------------------|---------------|----------------------|------------------------|-------------------------|--------------------|-----------------------|-----|
|                             |               | Sturnidae            | Sturnus                | <i>S. cineraceus</i>    | As                 | 105                   |     |
|                             |               |                      |                        | <i>S. tristis</i>       | As, Oce            | 87                    |     |
|                             |               | Sylviidae            | Acrocephalus           | <i>A. agricola</i>      | Eu                 | 1, 2                  |     |
|                             |               |                      |                        | <i>A. arundinaceus</i>  | Eu                 | 2, 28, 74, 106        |     |
|                             |               |                      |                        | <i>A. palustris</i>     | As                 | 4                     |     |
|                             |               |                      |                        | <i>A. schoenobaenus</i> | Af                 | 85                    |     |
|                             |               |                      |                        | <i>A. scirpaceus</i>    | Af, As, Eu         | 28, 85, 107           | *   |
|                             |               |                      | Cettia                 | <i>C. cetti</i>         | As, Eu             | 6, 28, 54             |     |
|                             |               |                      | Hippolais              | <i>H. polyglotta</i>    | Eu                 | 4, 6, 54              | *   |
|                             |               |                      | Sylvia                 | <i>S. atricapilla</i>   | Eu                 | 4, 6, 41, 54, 75, 108 |     |
|                             |               |                      |                        | <i>S. borin</i>         | Af, As, Eu         | 4, 6, 31, 54, 76, 89  | *   |
|                             |               |                      |                        | <i>S. communis</i>      | As, Eu             | 4, 12, 54, This study | *   |
|                             |               |                      |                        | <i>S. curruca</i>       | Af, As             | 4, 54, 85             |     |
|                             |               |                      |                        | <i>S. deserticola</i>   | Af                 | 6, 54                 |     |
|                             |               |                      |                        | <i>S. melanocephala</i> | Af, Eu             | 4, 6, 54              |     |
|                             |               |                      |                        | <i>S. nisoria</i>       | Eu                 | 2                     |     |
|                             |               | <i>S. undata</i>     | Eu                     | 6, 54                   |                    |                       |     |
|                             |               | Turdidae             | Erithacus              | <i>E. rubecula</i>      | As, Eu             | 4, 6, 54              | *   |
|                             |               |                      | Luscinia               | <i>L. svecica</i>       | Eu, As             | 8, 37, 77             | *   |
|                             |               |                      | Monticola              | <i>M. saxatilis</i>     | As                 | 54                    |     |
|                             |               |                      | Saxicola               | <i>S. rubetra</i>       | Af, Eu             | 4                     | *   |
|                             |               |                      |                        | <i>S. maura</i>         | As                 | 54                    |     |
|                             |               |                      | Turdus                 | <i>T. merula</i>        | Eu                 | 39                    |     |
|                             |               | <i>T. viscivorus</i> |                        | Af                      | 6, 54              |                       |     |
|                             |               | Tyrannidae           | Sayornis               | <i>S. nigricans</i>     | S Am               | 86                    |     |
|                             |               |                      | Serpophaga             | <i>S. cinerea</i>       | S Am               | 86                    |     |
|                             |               | Procellariiformes    | Procellariidae         | Pachyptila              | <i>P. belcheri</i> | S Am                  | 109 |
| Spheniciformes              | Spheniscidae  | Spheniscus           | <i>S. humboldti</i>    | As                      | 53                 |                       |     |
| Strigiformes                | Strigidae     | Athene               | <i>A. noctua</i>       | Eu                      | 6, 54              |                       |     |
| Trochiliformes              | Trochilidae   | Amazilia             | <i>A. chionogaster</i> | S Am                    | 86                 |                       |     |
|                             |               | Colibri              | <i>C. coruscans</i>    | S Am                    | 86                 |                       |     |
| <i>Plasmodium sp.</i> COLL1 | Passeriformes | Fringillidae         | Emberiza               | <i>E. cia</i>           | Eu                 | 6                     |     |
|                             |               |                      | <i>E. cirlus</i>       | Eu                      | 6                  |                       |     |
|                             |               | Motacillidae         | Anthus                 | <i>A. campestris</i>    | Eu                 | 49                    | *   |
|                             |               |                      | Motacilla              | <i>M. flava</i>         | Eu                 | 2, 4, 96              | *   |



|                            |                       |               |                        |                          |        |                        |   |
|----------------------------|-----------------------|---------------|------------------------|--------------------------|--------|------------------------|---|
| <i>Plasmodium sp. GRW9</i> |                       | Paridae       | Cyanistes              | <i>C. caeruleus</i>      | Eu     | 19, 68                 |   |
|                            |                       | Passeridae    | Passer                 | <i>P. domesticus</i>     | Eu     | 2, 62, 64, 110         |   |
|                            |                       |               |                        | <i>P. hispaniolensis</i> | Eu     | 2, 66                  |   |
|                            |                       | Ploceidae     | Euplectes              | <i>E. orix</i>           | Af     | 95                     |   |
|                            |                       | Sylviidae     | Acrocephalus           | <i>A. paludicola</i>     | Eu     | This study             | * |
|                            | Locustella            |               | <i>L. luscinioides</i> | Eu                       | 28     |                        |   |
|                            | Sylvia                |               | <i>S. atricapilla</i>  | Eu                       | 4, 75  |                        |   |
|                            | Passeriformes         | Cisticolidae  | Camaroptera            | <i>C. brachyura</i>      | Af     | 4, 40, 87              |   |
|                            |                       | Dicruridae    | Dicrurus               | <i>D. adsimilis</i>      | Af     | 40, 87                 |   |
|                            |                       |               | Rhipidura              | <i>R. rufifrons</i>      | Oce    | 87                     |   |
|                            |                       | Estrildidae   | Estrilda               | <i>E. astrild</i>        | Af     | 87                     |   |
|                            |                       |               |                        | <i>E. melpoda</i>        | Af     | Loiseau unpubl         |   |
|                            |                       |               | Lonchura               | <i>L. cucullata</i>      | Af     | Loiseau unpubl         |   |
|                            |                       |               | Pyrenestes             | <i>P. ostrinus</i>       | Af     | 40, 87                 |   |
|                            |                       |               | Spermophaga            | <i>S. haematina</i>      | Af     | 40, 87                 |   |
|                            |                       |               | Uraeginthus            | <i>U. angolensis</i>     | Af     | 29                     |   |
|                            |                       | Fringillidae  | Crithagra              | <i>C. capistrata</i>     | Af     | Loiseau unpubl         |   |
|                            |                       |               | Serinus                | <i>S. mozambicus</i>     | Af     | 29                     |   |
|                            |                       | Hirundinidae  | Delichon               | <i>D. urbicum</i>        | Eu     | 59, 60                 |   |
|                            |                       |               | Hirundo                | <i>H. rustica</i>        | Eu     | 2                      |   |
|                            |                       |               | Phedina                | <i>P. borbonica</i>      | Af     | 111                    |   |
|                            |                       |               | Psalidoprocne          | <i>P. albiceps</i>       | Af     | 29                     |   |
|                            |                       | Laniidae      | Lanius                 | <i>L. collurio</i>       | Eu     | 4                      |   |
|                            |                       | Motacillidae  | Motacilla              | <i>M. flaviventris</i>   | Af     | 111                    |   |
|                            |                       | Muscicapidae  | Copsychus              | <i>C. albospecularis</i> | Afica  | 111                    |   |
|                            |                       |               | Cossypha               | <i>C. heuglini</i>       | Af     | 29                     |   |
|                            |                       |               |                        | <i>C. niveicapilla</i>   | Af     | 40, 87                 |   |
|                            |                       |               | Ficedula               | <i>F. albicollis</i>     | Eu     | 11, 20, 21, 22, 25, 97 |   |
|                            |                       |               |                        | <i>F. hypoleuca</i>      | As, Eu | 12, 20, 98, This study | * |
|                            |                       |               |                        | <i>F. semitorquata</i>   | Eu     | 112                    |   |
|                            |                       |               | Muscicapa              | <i>M. olivascens</i>     | Af     | 40, 87                 |   |
|                            |                       | Pogonocichla  | <i>P. stellata</i>     | Af                       | 29     |                        |   |
|                            |                       | Nectariniidae | Chalcomitra            | <i>C. rubescens</i>      | Af     | 40, 87                 |   |
|                            |                       |               | Cinnyris               | <i>C. chloropygius</i>   | Af     | 113                    |   |
|                            | <i>C. fuelleborni</i> |               |                        | Af                       | 73     |                        |   |

|  |                |                     |                            |    |                      |  |
|--|----------------|---------------------|----------------------------|----|----------------------|--|
|  |                |                     | <i>C. mediocris</i>        | Af | 113                  |  |
|  |                | Cyanomitra          | <i>C. olivacea</i>         | Af | 40, 73, 87, 113, 114 |  |
|  |                |                     | <i>C. verticalis</i>       | Af | 40, 87               |  |
|  |                | Deleomis            | <i>D. fraseri</i>          | Af | 40, 87               |  |
|  |                | Hedydipna           | <i>H. collaris</i>         | Af | 40, 87, 113          |  |
|  |                | Nectarinia          | <i>N. chloropugia</i>      | Af | 73                   |  |
|  | Passeridae     | Gymnoris            | <i>G. superciliaris</i>    | Af | 29                   |  |
|  | Philepittidae  | Philepitta          | <i>P. castanea</i>         | Af | 111                  |  |
|  | Platysteiridae | Batis               | <i>B. mixta</i>            | Af | 73                   |  |
|  | Ploceidae      | Euplectes           | <i>E. hordeaceus</i>       | Af | Loiseau unpubl       |  |
|  |                | Foudia              | <i>F. hypoleuca</i>        | Af | 111                  |  |
|  |                |                     | <i>F. madagascariensis</i> | Af | 111                  |  |
|  |                | Malimbus            | <i>M. nitens</i>           | Af | 40, 87               |  |
|  |                | Ploceus             | <i>P. cucullatus</i>       | Af | 40, 87               |  |
|  |                |                     | <i>P. nelicourvi</i>       | Af | 111                  |  |
|  | Quelea         | <i>Q. quelea</i>    | Af                         | 29 |                      |  |
|  | Pycnonotidae   | Andropadus          | <i>A. chlorigula</i>       | Af | 73                   |  |
|  |                |                     | <i>A. gracilis</i>         | Af | 40, 87               |  |
|  |                |                     | <i>A. latirostris</i>      | Af | 115, 116             |  |
|  |                |                     | <i>A. masukuensis</i>      | Af | 73                   |  |
|  |                |                     | <i>A. milanjensis</i>      | Af | 29, 73               |  |
|  |                |                     | <i>A. virens</i>           | Af | 40, 87               |  |
|  |                | Bernieria           | <i>B. madagascariensis</i> | Af | 111                  |  |
|  |                | Bleda               | <i>B. eximius</i>          | Af | 4, 40, 87            |  |
|  |                |                     | <i>B. notatus</i>          | Af | 87                   |  |
|  |                |                     | <i>B. syndactylus</i>      | Af | 40, 87               |  |
|  |                | Criniger            | <i>C. calurus</i>          | Af | 40, 87               |  |
|  |                |                     | <i>C. chloronotus</i>      | Af | 40, 87               |  |
|  |                | Hypsipetes          | <i>H. madagascariensis</i> | Af | 111                  |  |
|  |                | Nicator             | <i>N. chloris</i>          | Af | 40, 87               |  |
|  | Phyllastrephus | <i>P. icterinus</i> | Af                         | 40 |                      |  |
|  | Pycnonotus     | <i>P. barbatus</i>  | Af                         | 4  |                      |  |

|                                                  |                         |              |                    |                           |                     |                 |       |
|--------------------------------------------------|-------------------------|--------------|--------------------|---------------------------|---------------------|-----------------|-------|
|                                                  |                         | Sylviidae    | Acrocephalus       | <i>A. arundinaceus</i>    | Eu                  | 106             |       |
|                                                  |                         |              | Bradypterus        | <i>B. baboecala</i>       | Af                  | 29              |       |
|                                                  |                         |              | Nesillas           | <i>N. typica</i>          | Af                  | 111             |       |
|                                                  |                         |              | Sylvia             | <i>S. borin</i>           | Eu                  | 4               | *     |
|                                                  |                         | Timallidae   | Modulatrix         | <i>M. stictigula</i>      | Af                  | 73              |       |
|                                                  |                         | Turdidae     | Alethe             | <i>A. fuelleborni</i>     | Af                  | 73              |       |
|                                                  |                         |              |                    | <i>A. poliocephala</i>    | Af                  | 40, 87          |       |
|                                                  |                         |              | Neocossyphus       | <i>N. fraseri</i>         | Af                  | 40, 87          |       |
|                                                  |                         |              |                    | <i>N. poensis</i>         | Af                  | 40, 87          |       |
|                                                  |                         |              |                    | <i>N. rufus</i>           | Af                  | 40, 87          |       |
|                                                  |                         |              | Saxicola           | <i>S. rubetra</i>         | Eu                  | 4               | *     |
|                                                  |                         |              |                    | <i>S. torquata</i>        | Af                  | 111             |       |
|                                                  |                         |              | Sheppardia         | <i>S. sharpei</i>         | Af                  | 73              |       |
| Stiphornis                                       | <i>S. erythrothorax</i> | Af           | 40, 87             |                           |                     |                 |       |
| Zoothera                                         | <i>Z. camaronensis</i>  | Af           | 40, 87             |                           |                     |                 |       |
| <i>Plasmodium sp. SYAT24</i>                     | Passeriformes           | Sylviidae    | Sylvia             | <i>S. atricapilla</i>     | Eu                  | 4, 75           |       |
| <i>Plasmodium vaughani</i><br>SYAT05 (Rinshi-11) | Columbiformes           | Columbidae   | Hemiphaga          | <i>H. novaeseelandiae</i> | Oce                 | 117             |       |
|                                                  | Passeriformes           | Alaudidae    | Alauda             | <i>A. arvensis</i>        | Eu                  | 51              |       |
|                                                  |                         | Cinclidae    | Cinclus            | <i>C. cinclus</i>         | Eu                  | 34              |       |
|                                                  |                         | Fringillidae | Fringilla          | <i>F. coelebs</i>         | Eu                  | 118             |       |
|                                                  |                         | Melipgagidae | Anthornis          | <i>A. melanura</i>        | Oce                 | 119             |       |
|                                                  |                         | Muscicapidae | Ficedula           | <i>F. parva</i>           | Eu                  | 2               |       |
|                                                  |                         |              |                    | Cyanistes                 | <i>C. caeruleus</i> | Eu              | 6, 54 |
|                                                  |                         | Paridae      | Parus              | <i>P. major</i>           | Eu                  | 7               |       |
|                                                  |                         |              |                    | <i>P. australis</i>       | Oce                 | 120             |       |
|                                                  |                         | Petroicidae  | Petroica           | <i>P. macrocephala</i>    | Oce                 | 92              |       |
|                                                  |                         |              |                    | <i>S. unicolor</i>        | Eu                  | 6, 54           |       |
|                                                  |                         | Sturnidae    | Sturnus            | <i>S. unicolor</i>        | Eu                  | 6, 54           |       |
|                                                  |                         | Sylviidae    | Cettia             | <i>C. cetti</i>           | Eu                  | 28              |       |
|                                                  |                         |              |                    | <i>S. atricapilla</i>     | Eu                  | 6, 54, 108, 121 |       |
|                                                  |                         |              | Sylvia             | <i>S. borin</i>           | Eu                  | 31              | *     |
|                                                  |                         |              |                    | <i>S. communis</i>        | Eu                  | This study      | *     |
|                                                  | <i>S. malanocephala</i> |              |                    | Eu                        | 4                   |                 |       |
|                                                  | Turdidae                | Erythacus    | <i>E. rubecula</i> | Eu                        | 118                 | *               |       |
|                                                  |                         | Saxicola     | <i>S. maura</i>    | As                        | 54                  |                 |       |

|  |                |              |               |                       |                    |                                    |  |
|--|----------------|--------------|---------------|-----------------------|--------------------|------------------------------------|--|
|  |                |              | Turdus        | <i>T. merula</i>      | Af, As, Eu,<br>Oce | 2, 6, 7, 41, 54, 92, 117, 118, 120 |  |
|  |                |              |               | <i>T. migratorius</i> | N Am               | 38, 122                            |  |
|  |                |              |               | <i>T. pelios</i>      | Af                 | Loiseau unpubl                     |  |
|  |                |              |               | <i>T. philomelos</i>  | Eu                 | 6, 7, 54                           |  |
|  |                |              |               | <i>T. viscivorus</i>  | Af                 | 6, 54                              |  |
|  |                | Zosteropidae | Zosterops     | <i>Z. lateralis</i>   | Oce                | 120                                |  |
|  | Psittaciformes | Psittacidae  | Melopsittacus | <i>M. undulatus</i>   | Oce                | 42                                 |  |

1. Zehtindjiev, P., Ilieva, M., Križanauskienė, A., Oparina, O., Oparin, M., & Bensch, S. (2009). Occurrence of haemosporidian parasites in the paddyfield warbler, *Acrocephalus agricola* (Passeriformes, Sylviidae). *Acta Parasitologica*, *54*(4), 295-300.
2. Dimitrov, D., Zehtindjiev, P., & Bensch, S. (2010). Genetic diversity of avian blood parasites in SE Europe: Cytochrome b lineages of the genera *Plasmodium* and *Haemoproteus* (Haemosporida) from Bulgaria. *Acta Parasitologica*, *55*(3), 201-209.
3. Ishtiaq, F. (2017). Exploring host and geographical shifts in transmission of haemosporidians in a Palearctic passerine wintering in India. *Journal of Ornithology*, *158*(3), 869-874.
4. Hellgren, O., Waldenström, J., Pérez-Tris, J., Szöll, E., Si, Ö., Hasselquist, D., Krizanauskiene, A., Ottosson, U. & Bensch, S. (2007). Detecting shifts of transmission areas in avian blood parasites—a phylogenetic approach. *Molecular Ecology*, *16*(6), 1281-1290.
5. Reullier, J., Pérez-Tris, J., Bensch, S., & Secondi, J. (2006). Diversity, distribution and exchange of blood parasites meeting at an avian moving contact zone. *Molecular Ecology*, *15*(3), 753-763.
6. Mata, V. A., da Silva, L. P., Lopes, R. J., & Drovetski, S. V. (2015). The Strait of Gibraltar poses an effective barrier to host-specialised but not to host-generalised lineages of avian Haemosporidia. *International Journal for Parasitology*, *45*(11), 711-719.
7. Santiago-Alarcon, D., MacGregor-Fors, I., Kühnert, K., Segelbacher, G., & Schaefer, H. M. (2016). Avian haemosporidian parasites in an urban forest and their relationship to bird size and abundance. *Urban Ecosystems*, *19*(1), 331-346.
8. Hellgren, O. (2005). The occurrence of haemosporidian parasites in the Fennoscandian bluethroat (*Luscinia svecica*) population. *Journal of Ornithology*, *146*(1), 55-60.
9. Valkiūnas, G., Kazlauskienė, R., Bernotienė, R., Palinauskas, V., & Iezhova, T. A. (2013). Abortive long-lasting sporogony of two *Haemoproteus* species (Haemosporida, Haemoproteidae) in the mosquito *Ochlerotatus cantans*, with perspectives on haemosporidian vector research. *Parasitology Research*, *112*(6), 2159-2169.

10. Nilsson, E., Taubert, H., Hellgren, O., Huang, X., Palinauskas, V., Markovets, M.Y., Valkiūnas, G. & Bensch, S. (2016). Multiple cryptic species of sympatric generalists within the avian blood parasite *Haemoproteus majoris*. *Journal of Evolutionary Biology*, 29(9), pp.1812-1826.
11. Radwan, J., Zagalska-Neubauer, M., Cichoń, M., Sendecka, J., Kulma, K., Gustafsson, L., & Babik, W. (2012). MHC diversity, malaria and lifetime reproductive success in collared flycatchers. *Molecular Ecology*, 21(10), 2469-2479.
12. Križanauskienė, A., Hellgren, O., Kosarev, V., Sokolov, L., Bensch, S., & Valkiūnas, G. (2006). Variation in host specificity between species of avian hemosporidian parasites: evidence from parasite morphology and cytochrome b gene sequences. *Journal of Parasitology*, 92(6), 1319-1324.
13. Hellgren, O., Križanauskienė, A., Valkiūnas, G., & Bensch, S. (2007). Diversity and phylogeny of mitochondrial cytochrome B lineages from six morphospecies of avian *Haemoproteus* (Haemosporida: Haemoproteidae). *Journal of Parasitology*, 93(4), 889-896.
14. Valkiūnas, G., Palinauskas, V., Križanauskienė, A., Bernotienė, R., Kazlauskienė, R., & Iezhova, T. A. (2013). Further observations on in vitro hybridization of hemosporidian parasites: patterns of ookinete development in *Haemoproteus* spp. *Journal of Parasitology*, 99(1), 124-136.
15. Valkiūnas, G., Iezhova, T. A., Križanauskienė, A., Palinauskas, V., & Bensch, S. (2008). In vitro hybridization of *Haemoproteus* spp.: an experimental approach for direct investigation of reproductive isolation of parasites. *Journal of Parasitology*, 94(6), 1385-1394.
16. Wood, M. J., Cosgrove, C. L., Wilkin, T. A., Knowles, S. C., Day, K. P., & Sheldon, B. C. (2007). Within-population variation in prevalence and lineage distribution of avian malaria in blue tits, *Cyanistes caeruleus*. *Molecular Ecology*, 16(15), 3263-3273.
17. Cosgrove, C. L., Wood, M. J., Day, K. P., & Sheldon, B. C. (2008). Seasonal variation in Plasmodium prevalence in a population of blue tits *Cyanistes caeruleus*. *Journal of Animal Ecology*, 77(3), 540-548.
18. Knowles, S. C., Wood, M. J., Alves, R., Wilkin, T. A., Bensch, S., & Sheldon, B. C. (2011). Molecular epidemiology of malaria prevalence and parasitaemia in a wild bird population. *Molecular Ecology*, 20(5), 1062-1076.

19. Szöllösi, E., Cichoń, M., Eens, M., Hasselquist, D., Kempnaers, B., Merino, S., Nilsson, J.Å., Rosivall, B., Rytönen, S., Török, J. & Wood, M.J. (2011). Determinants of distribution and prevalence of avian malaria in blue tit populations across Europe: separating host and parasite effects. *Journal of Evolutionary Biology*, 24(9), pp.2014-2024.
20. Kulma, K., Low, M., Bensch, S., & Qvarnström, A. (2013). Malaria infections reinforce competitive asymmetry between two *Ficedula* flycatchers in a recent contact zone. *Molecular Ecology*, 22(17), 4591-4601.
21. Kulma, K., Low, M., Bensch, S., & Qvarnström, A. (2014). Malaria-infected female collared flycatchers (*Ficedula albicollis*) do not pay the cost of late breeding. *PloS One*, 9(1), e85822.
22. Garamszegi, L.Z., Zagalska-Neubauer, M., Canal, D., Markó, G., Szász, E., Zsebök, S., Szöllösi, E., Herczeg, G. & Török, J. (2015). Malaria parasites, immune challenge, MHC variability, and predator avoidance in a passerine bird. *Behavioral Ecology*, 26(5), 1292-1302.
23. Križanauskienė, A., Iezhova, T. A., Palinauskas, V., Chernetsov, N., & Valkiūnas, G. (2012). *Haemoproteus nucleocondensus* n. sp. (Haemosporida, Haemoproteidae) from a Eurasian songbird, the Great Reed Warbler *Acrocephalus arundinaceus*. *Zootaxa*, 3441(1), 36-46.
24. Palinauskas, V., Iezhova, T.A., Križanauskienė, A., Markovets, M.Y., Bensch, S. & Valkiūnas, G. (2013). Molecular characterization and distribution of *Haemoproteus minutus* (Haemosporida, Haemoproteidae): a pathogenic avian parasite. *Parasitology International*, 62(4), 358-363.
25. Szöllösi, E., Garamszegi, L. Z., Hegyi, G., Laczi, M., Rosivall, B., & Török, J. (2016). *Haemoproteus* infection status of collared flycatcher males changes within a breeding season. *Parasitology Research*, 115(12), 4663-4672.
26. Wood, M. J., Childs, D. Z., Davies, A. S., Hellgren, O., Cornwallis, C. K., Perrins, C. M., & Sheldon, B. C. (2013). The epidemiology underlying age-related avian malaria infection in a long-lived host: the mute swan *Cygnus olor*. *Journal of Avian Biology*, 44(4), 347-358.
27. Bensch, S., & Åkesson, S. (2003). Temporal and spatial variation of hematozoans in Scandinavian willow warblers. *Journal of Parasitology*, 89(2), 388-391.

28. Ventim, R., Morais, J., Pardal, S., Mendes, L., Ramos, J. A., & Perez-Tris, J. (2012). Host-parasite associations and host-specificity in haemoparasites of reed bed passerines. *Parasitology*, *139*(3), 310-316.
29. Lutz, H.L., Hochachka, W.M., Engel, J.I., Bell, J.A., Tkach, V.V., Bates, J.M., Hackett, S.J. & Weckstein, J.D. (2015). Parasite prevalence corresponds to host life history in a diverse assemblage of afrotropical birds and haemosporidian parasites. *PloS One*, *10*(4), p.e0121254.
30. Dimitrov, D., Iezhova, T.A., Zehtindjiev, P., Bobeva, A., Ilieva, M., Kirilova, M., Bedev, K., Sjöholm, C. & Valkiūnas, G. (2016). Molecular characterisation of three avian haemoproteids (Haemosporida, Haemoproteidae), with the description of *Haemoproteus* (Parahaemoproteus) *palloris* n. sp. *Systematic Parasitology*, *93*(5), 431-449.
31. López, G., Muñoz, J., Soriguer, R., & Figuerola, J. (2013). Increased endoparasite infection in late-arriving individuals of a trans-Saharan passerine migrant bird. *PloS One*, *8*(4), e61236.
32. Zehtindjiev, P., Ivanova, K., Mariaux, J., & Georgiev, B. B. (2013). First data on the genetic diversity of avian haemosporidians in China: cytochrome b lineages of the genera *Plasmodium* and *Haemoproteus* (Haemosporida) from Gansu Province. *Parasitology Research*, *112*(10), 3509-3515.
33. Casanueva, P., Fernández, M., Ángeles Rojo, M., & Campos, F. (2012). High prevalence of haemosporidian parasites infection in southern grey shrike *Lanius meridionalis* (Laniidae, Aves) from agricultural areas. *Italian Journal of Zoology*, *79*(2), 315-318.
34. Rojo, M. Á., Hernández, M. Á., Campos, F., Santamaría, T., Dias, S., & Casanueva, P. (2015). The Iberian Peninsula is an area of infection by *Haemoproteus payevskyi* and *Haemoproteus nucleocondensus* for the White-throated Dipper *Cinclus cinclus*. *Ardeola*, *62*(2), 373-382.
35. Bensch, S., Stjernman, M., Hasselquist, D., Örjan, Ö., Hansson, B., Westerdahl, H., & Pinheiro, R. T. (2000). Host specificity in avian blood parasites: a study of *Plasmodium* and *Haemoproteus* mitochondrial DNA amplified from birds. *Proceedings of the Royal Society of London B: Biological Sciences*, *267*(1452), 1583-1589.
36. Fernández, M., Rojo, M. Á., Casanueva, P., Carrión, S., Hernández, M. Á., & Campos, F. (2010). High prevalence of haemosporidians in Reed Warbler



- Acrocephalus scirpaceus* and Sedge Warbler *Acrocephalus schoenobaenus* in Spain. *Journal of Ornithology*, 151(1), 27.
37. Rojo, M. Á., Campos, F., Santamaría, T., & Hernández, M. Á. (2014). Haemosporidians in Iberian bluethroats *Luscinia svecica*. *Ardeola*, 61(1), 135-143.
38. Martinsen, E. S., Perkins, S. L., & Schall, J. J. (2008). A three-genome phylogeny of malaria parasites (*Plasmodium* and closely related genera): evolution of life-history traits and host switches. *Molecular Phylogenetics and Evolution*, 47(1), 261-273.
39. Martínez-de la Puente, J., Muñoz, J., Capelli, G., Montarsi, F., Soriguer, R., Arnoldi, D., Rizzoli, A. & Figuerola, J. (2015). Avian malaria parasites in the last supper: identifying encounters between parasites and the invasive Asian mosquito tiger and native mosquito species in Italy. *Malaria Journal*, 14(1), 32.
40. Beadell, J.S., Covas, R., Gebhard, C., Ishtiaq, F., Melo, M., Schmidt, B.K., Perkins, S.L., Graves, G.R. & Fleischer, R.C. (2009). Host associations and evolutionary relationships of avian blood parasites from West Africa. *International Journal for Parasitology*, 39(2), 257-266.
41. Padilla, D. P., Illera, J. C., Gonzalez-Quevedo, C., Villalba, M., & Richardson, D. S. (2017). Factors affecting the distribution of haemosporidian parasites within an oceanic island. *International Journal for Parasitology*, 47(4), 225-235.
42. Baron, H. R., Howe, L., Varsani, A., & Doneley, R. J. (2013). Disease screening of three breeding populations of adult exhibition budgerigars (*Melopsittacus undulatus*) in New Zealand reveals a high prevalence of a novel polyomavirus and avian malaria infection. *Avian Diseases*, 58(1), 111-117.
43. Gutiérrez-López, R., Gangoso, L., Martínez-de la Puente, J., Fric, J., López-López, P., Mailleux, M., Muñoz, J., Touati, L., Samraoui, B. & Figuerola, J. (2015). Low prevalence of blood parasites in a long-distance migratory raptor: the importance of host habitat. *Parasites & Vectors*, 8(1), 189.
44. Gangoso, L., Gutiérrez-López, R., Martínez-de la Puente, J., & Figuerola, J. (2016). Genetic colour polymorphism is associated with avian malarial infections. *Biology Letters*, 12(12), 20160839.
45. Ortego, J., Calabuig, G., Cordero, P. J., & Aparicio, J. M. (2007). Genetic characterization of avian malaria (Protozoa) in the endangered lesser kestrel, *Falco naumanni*. *Parasitology Research*, 101(4), 1153-1156.

46. Ortego, J., Cordero, P. J., Aparicio, J. M., & Calabuig, G. (2008). Consequences of chronic infections with three different avian malaria lineages on reproductive performance of Lesser Kestrels (*Falco naumanni*). *Journal of Ornithology*, *149*(3), 337-343.
47. Illera, J. C., Emerson, B. C., & Richardson, D. S. (2008). Genetic characterization, distribution and prevalence of avian pox and avian malaria in the Berthelot's pipit (*Anthus berthelotii*) in Macaronesia. *Parasitology Research*, *103*(6), 1435-1443.
48. Spurgin, L. G., Illera, J. C., Padilla, D. P., & Richardson, D. S. (2012). Biogeographical patterns and co-occurrence of pathogenic infection across island populations of Berthelot's pipit (*Anthus berthelotii*). *Oecologia*, *168*(3), 691-701.
49. Calero-Riestra, M., & García, J. T. (2016). Sex-dependent differences in avian malaria prevalence and consequences of infections on nestling growth and adult condition in the Tawny pipit, *Anthus campestris*. *Malaria Journal*, *15*(1), 178.
50. Illera, J. C., Fernández-Álvarez, Á., Hernández-Flores, C. N., & Foronda, P. (2015). Unforeseen biogeographical patterns in a multiple parasite system in Macaronesia. *Journal of Biogeography*, *42*(10), 1858-1870.
51. Zehtindjiev, P., Križanauskienė, A., Scebba, S., Dimitrov, D., Valkiūnas, G., Hegemann, A., Tieleman, B.I. & Bensch, S. (2012). Haemosporidian infections in skylarks (*Alauda arvensis*): a comparative PCR-based and microscopy study on the parasite diversity and prevalence in southern Italy and the Netherlands. *European Journal of Wildlife Research*, *58*(1), 335-344.
52. Mendes, L., Pardal, S., Morais, J., Antunes, S., Ramos, J. A., Perez-Tris, J., & Piersma, T. (2013). Hidden haemosporidian infections in Ruffs (*Philomachus pugnax*) staging in Northwest Europe en route from Africa to Arctic Europe. *Parasitology Research*, *112*(5), 2037-2043.
53. Ejiri, H., Sato, Y., Sawai, R., Sasaki, E., Matsumoto, R., Ueda, M., Higa, Y., Tsuda, Y., Omori, S., Murata, K. & Yukawa, M. (2009). Prevalence of avian malaria parasite in mosquitoes collected at a zoological garden in Japan. *Parasitology Research*, *105*(3), 629.
54. Drovetski, S. V., Aghayan, S. A., Mata, V. A., Lopes, R. J., Mode, N. A., Harvey, J. A., & Voelker, G. (2014). Does the niche breadth or trade-off hypothesis

- explain the abundance–occupancy relationship in avian Haemosporidia?. *Molecular Ecology*, 23(13), 3322-3329.
55. Martinsen, E. S., Paperna, I., & Schall, J. J. (2006). Morphological versus molecular identification of avian Haemosporidia: an exploration of three species concepts. *Parasitology*, 133(3), 279-288.
56. Schmid, S., Facht, K., Dinkel, A., Mackenstedt, U., & Woog, F. (2017). Carrion crows (*Corvus corone*) of southwest Germany: important hosts for haemosporidian parasites. *Malaria Journal*, 16(1), 369.
57. Kim, K. S., & Tsuda, Y. (2010). Seasonal changes in the feeding pattern of *Culex pipiens pallens* govern the transmission dynamics of multiple lineages of avian malaria parasites in Japanese wild bird community. *Molecular Ecology*, 19(24), 5545-5554.
58. Marzal, A., Bensch, S., Reviriego, M., Balbontin, J., & De Lope, F. (2008). Effects of malaria double infection in birds: one plus one is not two. *Journal of Evolutionary Biology*, 21(4), 979-987.
59. Piersma, T., & van der Velde, M. (2012). Dutch House Martins *Delichon urbicum* gain blood parasite infections over their lifetime, but do not seem to suffer. *Journal of Ornithology*, 153(3), 907-912.
60. van Rooyen, J., Jenkins, T., Lahlah, N., & Christe, P. (2014). North–African house martins endure greater haemosporidian infection than their European counterparts. *Journal of Avian Biology*, 45(5), 450-456.
61. Kim, K. S., Tsuda, Y., & Yamada, A. (2009). Bloodmeal identification and detection of avian malaria parasite from mosquitoes (Diptera: Culicidae) inhabiting coastal areas of Tokyo Bay, Japan. *Journal of Medical Entomology*, 46(5), 1230-1234.
62. Bonneaud, C., Pérez-Tris, J., Federici, P., Chastel, O., & Sorci, G. (2006). Major histocompatibility alleles associated with local resistance to malaria in a passerine. *Evolution*, 60(2), 383-389.
63. Loiseau, C., Zoorob, R., Garnier, S., Birard, J., Federici, P., Julliard, R., & Sorci, G. (2008). Antagonistic effects of a Mhc class I allele on malaria–infected house sparrows. *Ecology Letters*, 11(3), 258-265.
64. Marzal, A., Ricklefs, R.E., Valkiūnas, G., Albayrak, T., Arriero, E., Bonneaud, C., Cziriák, G.A., Ewen, J., Hellgren, O., Hořáková, D. & Iezhova, T.A. (2011).

- Diversity, loss, and gain of malaria parasites in a globally invasive bird. *PLoS One*, 6(7), p.e21905.
65. Gutiérrez-López, R., Martínez-de la Puente, J., Gangoso, L., Yan, J., Soriguer, R. C., & Figuerola, J. (2016). Do mosquitoes transmit the avian malaria-like parasite *Haemoproteus*? An experimental test of vector competence using mosquito saliva. *Parasites & Vectors*, 9(1), 609.
  66. Pérez-Tris, J., & Bensch, S. (2005). Dispersal increases local transmission of avian malarial parasites. *Ecology Letters*, 8(8), 838-845.
  67. Knowles, S. C. L., Palinauskas, V., & Sheldon, B. C. (2010). Chronic malaria infections increase family inequalities and reduce parental fitness: experimental evidence from a wild bird population. *Journal of Evolutionary Biology*, 23(3), 557-569.
  68. Ferrer, E. S., García-Navas, V., Sanz, J. J., & Ortego, J. (2012). Molecular characterization of avian malaria parasites in three Mediterranean blue tit (*Cyanistes caeruleus*) populations. *Parasitology Research*, 111(5), 2137-2142.
  69. Podmokła, E., Dubiec, A., Drobniak, S. M., Arct, A., Gustafsson, L., & Cichoń, M. (2014). Avian malaria is associated with increased reproductive investment in the blue tit. *Journal of Avian Biology*, 45(3), 219-224.
  70. Podmokła, E., Dubiec, A., Drobniak, S. M., Arct, A., Gustafsson, L., & Cichoń, M. (2014). Determinants of prevalence and intensity of infection with malaria parasites in the Blue Tit. *Journal of Ornithology*, 155(3), 721-727.
  71. Van Rooyen, J., Lalubin, F., Glazot, O., & Christe, P. (2013). Avian haemosporidian persistence and co-infection in great tits at the individual level. *Malaria Journal*, 12(1), 40.
  72. Dubiec, A., Podmokła, E., Zagalska-Neubauer, M., Drobniak, S. M., Arct, A., Gustafsson, L., & Cichoń, M. (2016). Differential prevalence and diversity of haemosporidian parasites in two sympatric closely related non-migratory passerines. *Parasitology*, 143(10), 1320-1329.
  73. Loiseau, C., Harrigan, R. J., Robert, A., Bowie, R. C., Thomassen, H. A., Smith, T. B., & Sehgal, R. N. (2012). Host and habitat specialization of avian malaria in Africa. *Molecular Ecology*, 21(2), 431-441.
  74. Zehntindjiev, P., Ilieva, M., Westerdahl, H., Hansson, B., Valkiūnas, G., & Bensch, S. (2008). Dynamics of parasitemia of malaria parasites in a naturally and

- experimentally infected migratory songbird, the great reed warbler *Acrocephalus arundinaceus*. *Experimental Parasitology*, 119(1), 99-110.
75. Pérez-Rodríguez, A., de la Hera, I., Bensch, S., & Pérez-Tris, J. (2015). Evolution of seasonal transmission patterns in avian blood-borne parasites. *International Journal for Parasitology*, 45(9-10), 605-611.
76. Hellgren, O., Wood, M. J., Waldenström, J., Hasselquist, D., Ottosson, U., Stervander, M., & Bensch, S. (2013). Circannual variation in blood parasitism in a sub-Saharan migrant passerine bird, the garden warbler. *Journal of Evolutionary Biology*, 26(5), 1047-1059.
77. Svoboda, A., Marthinsen, G., Pavel, V., Chutný, B., Turčoková, L., Lifjeld, J. T., & Johnsen, A. (2015). Blood parasite prevalence in the Bluethroat is associated with subspecies and breeding habitat. *Journal of Ornithology*, 156(2), 371-380.
78. Ferraguti, M., Martínez-de la Puente, J., Ruiz, S., Soriguer, R., & Figuerola, J. (2013). On the study of the transmission networks of blood parasites from SW Spain: diversity of avian haemosporidians in the biting midge *Culicoides circumscriptus* and wild birds. *Parasites & Vectors*, 6(1), 208.
79. Zagalska-Neubauer, M., & Bensch, S. (2016). High prevalence of *Leucocytozoon* parasites in fresh water breeding gulls. *Journal of Ornithology*, 157(2), 525-532.
80. Seimon, T.A., Gilbert, M., Neabore, S., Hollinger, C., Tomaszewicz, A., Newton, A., Chang, T. & McAloose, D. (2016). Avian Hemosporidian Parasite Lineages in Four Species of Free-ranging Migratory Waterbirds from Mongolia, 2008. *Journal of Wildlife Diseases*, 52(3), pp.682-687.
81. Pardal, S., Alves, J.A., Zé-Zé, L., Osório, H., Rocha, A., Lopes, R.J., Potts, P., Amaro, F., Santiago-Quesada, F., Sanchez-Guzman, J.M. & Masero, J. (2014). Shorebird low spillover risk of mosquito-borne pathogens on Iberian wetlands. *Journal of Ornithology*, 155(2), pp.549-554.
82. Ejiri, H., Sato, Y., Kim, K.S., Hara, T., Tsuda, Y., Imura, T., Murata, K. & Yukawa, M. (2011). Entomological study on transmission of avian malaria parasites in a zoological garden in Japan: bloodmeal identification and detection of avian malaria parasite DNA from blood-fed mosquitoes. *Journal of Medical Entomology*, 48(3), pp.600-607.
83. Scaglione, F. E., Pregel, P., Cannizzo, F. T., Pérez-Rodríguez, A. D., Ferroglio, E., & Bollo, E. (2015). Prevalence of new and known species of haemoparasites in feral pigeons in northwest Italy. *Malaria Journal*, 14(1), 99.

84. Svobodová, J., Gabrielová, B., Synek, P., Marsik, P., Vaněk, T., Albrecht, T., & Vinkler, M. (2013). The health signalling of ornamental traits in the Grey Partridge (*Perdix perdix*). *Journal of Ornithology*, *154*(3), 717-725.
85. Waldenström, J., Bensch, S., Kiboi, S., Hasselquist, D., & Ottosson, U. (2002). Cross-species infection of blood parasites between resident and migratory songbirds in Africa. *Molecular Ecology*, *11*(8), 1545-1554.
86. Marzal, A., García-Longoria, L., Callirgos, J. M. C., & Sehgal, R. N. (2015). Invasive avian malaria as an emerging parasitic disease in native birds of Peru. *Biological Invasions*, *17*(1), 39-45.
87. Beadell, J.S., Ishtiaq, F., Covas, R., Melo, M., Warren, B.H., Atkinson, C.T., Bensch, S., Graves, G.R., Jhala, Y.V., Peirce, M.A. & Rahmani, A.R. (2006). Global phylogeographic limits of Hawaii's avian malaria. *Proceedings of the Royal Society of London B: Biological Sciences*, *273*(1604), pp.2935-2944.
88. Palinauskas, V., Valkiūnas, G., Križanauskienė, A., Bensch, S., & Bolshakov, C. V. (2009). *Plasmodium relictum* (lineage P-SGS1): further observation of effects on experimentally infected passeriform birds, with remarks on treatment with Malarone™. *Experimental Parasitology*, *123*(2), 134-139.
89. Palinauskas, V., Valkiūnas, G., Bolshakov, C. V., & Bensch, S. (2011). *Plasmodium relictum* (lineage SGS1) and *Plasmodium ashfordi* (lineage GRW2): the effects of the co-infection on experimentally infected passerine birds. *Experimental Parasitology*, *127*(2), 527-533.
90. Synek, P., Albrecht, T., Vinkler, M., Schnitzer, J., Votýpka, J., & Munclinger, P. (2013). Haemosporidian parasites of a European passerine wintering in South Asia: diversity, mixed infections and effect on host condition. *Parasitology Research*, *112*(4), 1667-1677.
91. Palinauskas, V., Kosarev, V., Shapoval, A., Bensch, S., & Valkiūnas, G. (2007). Comparison of mitochondrial cytochrome b lineages and morphospecies of two avian malaria parasites of the subgenera *Haemamoeba* and *Giovannolaia* (Haemosporida: Plasmodiidae). *Zootaxa*, (1626), 39-50.
92. Ewen, J.G., Bensch, S., Blackburn, T.M., Bonneaud, C., Brown, R., Cassey, P., Clarke, R.H. & Pérez-Tris, J. (2012). Establishment of exotic parasites: the origins and characteristics of an avian malaria community in an isolated island avifauna. *Ecology Letters*, *15*(10), pp.1112-1119.

93. Huang, X., Dong, L., Zhang, C., & Zhang, Y. (2015). Genetic diversity, temporal dynamics, and host specificity in blood parasites of passerines in north China. *Parasitology Research*, *114*(12), 4513-4520.
94. Cellier-Holzem, E., Esparza-Salas, R., Garnier, S., & Sorci, G. (2010). Effect of repeated exposure to *Plasmodium relictum* (lineage SGS1) on infection dynamics in domestic canaries. *International Journal for Parasitology*, *40*(12), 1447-1453.
95. Okanga, S., Cumming, G. S., Hockey, P. A., Nupen, L., & Peters, J. L. (2014). Host specificity and co-speciation in avian haemosporidia in the Western Cape, South Africa. *PLoS One*, *9*(2), e86382.
96. Dimitrov, D., Valkiūnas, G.E., Zehindjiev, P., Ilieva, M. & Bensch, S. (2013). Molecular characterization of haemosporidian parasites (Haemosporida) in yellow wagtail (*Motacilla flava*), with description of in vitro ookinetes of *Haemoproteus motacillae*. *Zootaxa*. 3666(3), 369-81.
97. Szöllősi, E., Rosivall, B., Hasselquist, D., & Török, J. (2009). The effect of parental quality and malaria infection on nestling performance in the collared flycatcher (*Ficedula albicollis*). *Journal of Ornithology*, *150*(3), 519-527.
98. Wiersch, S. C., Lubjuhn, T., Maier, W. A., & Kampen, H. (2007). Haemosporidian infection in passerine birds from Lower Saxony. *Journal of Ornithology*, *148*(1), 17-24.
99. Stjernman, M., Råberg, L., & Nilsson, J. Å. (2008). Maximum host survival at intermediate parasite infection intensities. *Plos One*, *3*(6), e2463.
100. Martínez, J., Martínez-De La Puente, J., Herrero, J., Del Cerro, S., Lobato, E., Rivero-de Aguilar, J., Vásquez, R.A. & Merino, S. (2009). A restriction site to differentiate *Plasmodium* and *Haemoproteus* infections in birds: on the inefficiency of general primers for detection of mixed infections. *Parasitology*, *136*(7), pp.713-722.
101. Kim, K. S., Tsuda, Y., Sasaki, T., Kobayashi, M., & Hirota, Y. (2009). Mosquito blood-meal analysis for avian malaria study in wild bird communities: laboratory verification and application to *Culex sasai* (Diptera: Culicidae) collected in Tokyo, Japan. *Parasitology research*, *105*(5), 1351.
102. Glaizot, O., Fumagalli, L., Iritano, K., Lalubin, F., Van Rooyen, J., & Christe, P. (2012). High prevalence and lineage diversity of avian malaria in wild

- populations of great tits (*Parus major*) and mosquitoes (*Culex pipiens*). *PLoS One*, 7(4), e34964.
103. Isaksson, C., Sepil, I., Baramidze, V., & Sheldon, B. C. (2013). Explaining variance of avian malaria infection in the wild: the importance of host density, habitat, individual life-history and oxidative stress. *BMC Ecology*, 13(1), 15.
  104. Ventim, R., Mendes, L., Ramos, J. A., Cardoso, H., & Pérez-Tris, J. (2012). Local haemoparasites in introduced wetland passerines. *Journal of Ornithology*, 153(4), 1253-1259.
  105. Inumaru, M., Murata, K., & Sato, Y. (2017). Prevalence of avian Haemosporidia among injured wild birds in Tokyo and environs, Japan. *International Journal for Parasitology: Parasites and Wildlife*, 6(3), 299-309.
  106. Bensch, S., Waldenström, J., Jonzén, N., Westerdahl, H., Hansson, B., Sejberg, D., & Hasselquist, D. (2007). Temporal dynamics and diversity of avian malaria parasites in a single host species. *Journal of Animal Ecology*, 76(1), 112-122.
  107. Palinauskas, V., Valkiūnas, G., Bolshakov, C. V., & Bensch, S. (2008). *Plasmodium relictum* (lineage P-SGS1): effects on experimentally infected passerine birds. *Experimental Parasitology*, 120(4), 372-380.
  108. Santiago-Alarcon, D., Bloch, R., Rolshausen, G., Schaefer, H. M., & Segelbacher, G. (2011). Prevalence, diversity, and interaction patterns of avian haemosporidians in a four-year study of blackcaps in a migratory divide. *Parasitology*, 138(7), 824-835.
  109. Quillfeldt, P., Martínez, J., Hennicke, J., Ludynia, K., Gladbach, A., Masello, J.F., Riou, S. & Merino, S. (2010). Hemosporidian blood parasites in seabirds—a comparative genetic study of species from Antarctic to tropical habitats. *Naturwissenschaften*, 97(9), 809-817.
  110. Loiseau, C., Zoorob, R., Robert, A., Chastel, O., Julliard, R., & Sorci, G. (2011). *Plasmodium relictum* infection and MHC diversity in the house sparrow (*Passer domesticus*). *Proceedings of the Royal Society of London B: Biological Sciences*, 278(1709), 1264-1272.
  111. Schmid, S., Dinkel, A., Mackenstedt, U., Tantely, M. L., Randrianambinintsoa, F. J., Boyer, S., & Woog, F. (2017). Avian malaria on Madagascar: bird hosts and putative vector mosquitoes of different *Plasmodium* lineages. *Parasites & vectors*, 10(1), 6.



112. Peev, S., Zehtindjiev, P., Ilieva, M., Träff, J., Briedis, M., & Adamík, P. (2016). Haemosporidian blood parasite diversity and prevalence in the semi-collared flycatcher (*Ficedula semitorquata*) from the eastern Balkans. *Parasitology international*, 65(6), 613-617.
113. Lauron, E. J., Loiseau, C., Bowie, R. C., Spicer, G. S., Smith, T. B., Melo, M., & Sehgal, R. N. (2015). Coevolutionary patterns and diversification of avian malaria parasites in African sunbirds (Family Nectariniidae). *Parasitology*, 142(5), 635-647.
114. Chasar, A., Loiseau, C., Valkiūnas, G., Iezhova, T., Smith, T. B., & Sehgal, R. N. (2009). Prevalence and diversity patterns of avian blood parasites in degraded African rainforest habitats. *Molecular Ecology*, 18(19), 4121-4133.
115. Bonneaud, C., Sepil, I., Milá, B., Buermann, W., Pollinger, J., Sehgal, R.N., Valkiūnas, G., Iezhova, T.A., Saatchi, S. & Smith, T.B. (2009). The prevalence of avian Plasmodium is higher in undisturbed tropical forests of Cameroon. *Journal of Tropical Ecology*, 25(4), pp.439-447.
116. Loiseau, C., Iezhova, T., Valkiūnas, G., Chasar, A., Hutchinson, A., Buermann, W., Smith, T.B. & Sehgal, R.N. (2010). Spatial variation of haemosporidian parasite infection in African rainforest bird species. *Journal of Parasitology*, 96(1), 21-29.
117. Howe, L., Castro, I. C., Schoener, E. R., Hunter, S., Barraclough, R. K., & Alley, M. R. (2012). Malaria parasites (*Plasmodium* spp.) infecting introduced, native and endemic New Zealand birds. *Parasitology Research*, 110(2), 913-923.
118. Hellgren, O., Križanauskienė, A., Hasselquist, D., & Bensch, S. (2011). Low haemosporidian diversity and one key-host species in a bird malaria community on a mid-Atlantic island (São Miguel, Azores). *Journal of Wildlife Diseases*, 47(4), 849-859.
119. Baillie, S. M., & Brunton, D. H. (2011). Diversity, distribution and biogeographical origins of *Plasmodium* parasites from the New Zealand bellbird (*Anthornis melanura*). *Parasitology*, 138(14), 1843-1851.
120. Niebuhr, C. N., Poulin, R., & Tompkins, D. M. (2016). Is avian malaria playing a role in native bird declines in New Zealand? Testing hypotheses along an elevational gradient. *PloS One*, 11(11), e0165918.

121. Pérez-Rodríguez, A., Ramírez, Á., Richardson, D. S., & Pérez-Tris, J. (2013). Evolution of parasite island syndromes without long-term host population isolation: Parasite dynamics in Macaronesian blackcaps *Sylvia atricapilla*. *Global Ecology and Biogeography*, 22(12), 1272-1281.
122. Martinsen, E. S., Waite, J. L., & Schall, J. J. (2007). Morphologically defined subgenera of *Plasmodium* from avian hosts: test of monophyly by phylogenetic analysis of two mitochondrial genes. *Parasitology*, 134(4), 483-490.
